# Supplementary material for: The Safety and Efficacy of Phage Therapy for Superficial Bacterial Infections: A Systematic Review
Source: MDPI journal article supplement (doi:10.3390/antibiotics9110754), 2020-10-29
Supplement: s1 [file s1]

# Supplementary file four: phage therapy for the treatment of chronic wound or ulcer infections

| Report details                                                    |                                                                     | Clinical details  |                       |                                                                                                                                          |                                                                                                                                                                           | Efficacy                               |                                                    |       |          | Safety & adverse effects |                                                                                                                                                                                                                                                                                                                                                                                                                                                                                           |
|-------------------------------------------------------------------|---------------------------------------------------------------------|-------------------|-----------------------|------------------------------------------------------------------------------------------------------------------------------------------|---------------------------------------------------------------------------------------------------------------------------------------------------------------------------|----------------------------------------|----------------------------------------------------|-------|----------|--------------------------|-------------------------------------------------------------------------------------------------------------------------------------------------------------------------------------------------------------------------------------------------------------------------------------------------------------------------------------------------------------------------------------------------------------------------------------------------------------------------------------------|
| Author (year), [citation], location, study type                   | No. of relevant reports and microbiology                            | Condition details |                       | Phage sensitivity                                                                                                                        | Phage treatment                                                                                                                                                           | Treatment schedule and route(s)        | Outcome                                            | Cured | Improved | No response              |                                                                                                                                                                                                                                                                                                                                                                                                                                                                                           |
| Slopek <i>et al.</i> (1987) [33]<br><br>Poland<br><br>Case series | 16/550<br><br>Staphylococci in all cases. 14/16 were polymicrobial. | Decubitus ulcer   | Antibiotic resistant. | No phage sensitivity testing reported. However, according to (Slopek <i>et al.</i> 1983 [59]), sensitivity confirmed, results not shown. | No details. However, according to (Slopek <i>et al.</i> 1983 [59]), a library of 259 bacteriophages was available for use. Crude phage lysates were used therapeutically. | Oral and local phage therapy was used. | ‘Favourable effect’ in 13/16. Ineffective in 3/16. | 13    | 0        | 3                        | No comments specific to these patients.<br><br>However, according to (Slopek <i>et al.</i> 1983 [59]): ‘side effects in the course of phage therapy are very rare. Out of 138 [patients] only 3 cases were recorded of which 2 displayed drug intolerance at oral administration and 1 allergic symptoms at local application on the wound.’<br><br>‘On day 3-5 of phage therapy, hepatalgia occurred which lasted several hours. This can be accounted for mass liberation of endotoxins |

# Supplementary file four: phage therapy for the treatment of chronic wound or ulcer infections

|                                                                                            |                                                                                                                              |              |                                                                     |                                                            |                                                                                           |                                                                                                                                                                                                                                                                                                                                                                                       |                                                                                                                                    |    |    |   |                                                                                                                                                                                                                                                                                                                            |
|--------------------------------------------------------------------------------------------|------------------------------------------------------------------------------------------------------------------------------|--------------|---------------------------------------------------------------------|------------------------------------------------------------|-------------------------------------------------------------------------------------------|---------------------------------------------------------------------------------------------------------------------------------------------------------------------------------------------------------------------------------------------------------------------------------------------------------------------------------------------------------------------------------------|------------------------------------------------------------------------------------------------------------------------------------|----|----|---|----------------------------------------------------------------------------------------------------------------------------------------------------------------------------------------------------------------------------------------------------------------------------------------------------------------------------|
|                                                                                            |                                                                                                                              |              |                                                                     |                                                            |                                                                                           |                                                                                                                                                                                                                                                                                                                                                                                       |                                                                                                                                    |    |    |   | <p>resulting from phage effect on bacteria. [In] severe cases with sepsis, an increase of temperature occurred on day 7 - 8 of phage administration which lasted 24 h.'</p> <p>'Bacteriophages are safe, side effects are rather rare and present no danger for a patient, they are transient and easy for restraint.'</p> |
| <p>Weber-Dabrowska, Mulczyk &amp; Górski (2000), [47]</p> <p>Poland</p> <p>Case series</p> | <p>77/1307</p> <p>Infected by <i>S. aureus</i>, <i>E. coli</i>, <i>Klebsiella</i>, <i>Proteus</i> or <i>Pseudomonas</i>.</p> | Venous ulcer | Mostly chronic infections that had failed antibiotics.              | Combined sensitivity data presented for all 1307 patients. | Crude, sterile, bacteriophage lysate.                                                     | <p>Three times daily. Adults 10ml, children 5ml.</p> <p>Orally and '30 minutes before eating, after neutralisation of the gastric juice'.</p> <p>Local administration also used on a case-by-case basis, 'depending upon localisation of the suppurative process'.</p> <p>Therapy duration for all 1307 patients reported as ranging from 1-12 weeks, with an average of 32 days.</p> | <p>47/77 recovered fully.</p> <p>21/77 showed 'marked improvement', but bacteria were still detectable.</p> <p>9/77 no effect.</p> | 47 | 21 | 9 | No comment.                                                                                                                                                                                                                                                                                                                |
| <p>Markoishvili et al. (2002), [48]</p> <p>Georgia</p>                                     | <p>96/96</p> <p>Infected by <i>S. aureus</i>, <i>S. epidermidis</i>, <i>P.</i></p>                                           | Venous ulcer | Venous stasis ulcers clinically judged to be refractory to standard | Sensitivity confirmed.                                     | 'PhagoBioDerm'. A biodegradable bandage containing a mix of chemotherapeutics and phages: | Wounds rinsed with sterile 4% sodium bicarbonate prior to the application of PhagoBioDerm.                                                                                                                                                                                                                                                                                            | 67/96 achieved complete healing, with recovery ranging from 6 days to 15 months.                                                   | 67 | 24 | 5 | 'No systemic effects of therapy were observed in any of the patients'                                                                                                                                                                                                                                                      |

# Supplementary file four: phage therapy for the treatment of chronic wound or ulcer infections

|                                                                        |                                                                                                                                                               |                                                                                                                                             |                                                                                                   |                                        |                                                                                                                                                                                                                                                                                                                                                 |                                                                                                                                                                                                                                                                                                                                                                                                                                                                  |                                                                                                                                                                                                                                                                                                                                                            |               |   |    |                                                               |
|------------------------------------------------------------------------|---------------------------------------------------------------------------------------------------------------------------------------------------------------|---------------------------------------------------------------------------------------------------------------------------------------------|---------------------------------------------------------------------------------------------------|----------------------------------------|-------------------------------------------------------------------------------------------------------------------------------------------------------------------------------------------------------------------------------------------------------------------------------------------------------------------------------------------------|------------------------------------------------------------------------------------------------------------------------------------------------------------------------------------------------------------------------------------------------------------------------------------------------------------------------------------------------------------------------------------------------------------------------------------------------------------------|------------------------------------------------------------------------------------------------------------------------------------------------------------------------------------------------------------------------------------------------------------------------------------------------------------------------------------------------------------|---------------|---|----|---------------------------------------------------------------|
| Case series                                                            | <i>aeruginosa</i> , <i>E. coli</i> or $\beta$ -haemolytic <i>streptococcus</i> .<br>21/22 cases where microbiological data were available were polymicrobial. |                                                                                                                                             | therapy. Patients aged 31-101 years old.                                                          |                                        | 10 <sup>6</sup> PFU/ml 'Pyo' phage cocktail (vs. <i>S. aureus</i> , <i>P. aeruginosa</i> , <i>E. coli</i> , <i>Streptococcus</i> and <i>Proteus</i> )<br><br>Also: ciprofloxacin (0.6mg/cm <sup>2</sup> ); benzocaine (0.9mg/cm <sup>2</sup> ); $\alpha$ -chymotrypsin (0.05mg/cm <sup>2</sup> ); sodium bicarbonate (3.75mg/cm <sup>2</sup> ). | Wounds were examined daily for the first 5 days and once every 2-4 days thereafter. Microbiological monitoring data were available for 22 patients.<br><br>PhagoBioDerm was replaced when fragmented or degraded, typically every 3-7 days, or left in place if tightly attached or the wound had healed.<br><br>PhagoBioDerm was used as part of treatment schedules that varied between patients, some of which included clindamycin, Daflon or metronidazole. | Reduction in ulcer size and discharge was observed in 24 patients.<br><br>In 5 patients no improvement was seen. All had poorly controlled diabetes, one stopped phage after 1 week, the other four stopped after 1 month.<br><br>All 22 patients with microbiological monitoring showed bacterial counts eliminated or reduced by an average of 100-fold. |               |   |    |                                                               |
| Southwest Regional Wound Care Centre, 2006, [31]<br><br>US Case series | 17/28<br><br>Few microbiological details, presumed common skin pathogens, phages used against <i>P. aeruginosa</i> in one case.                               | Venous ulcer (n = 4)<br><br>Diabetic infection (foot; n = 7)<br><br>Decubitus ulcer (n = 5)<br><br>Community-acquired MRSA (CA-MRSA; n = 1) | Patients aged 53-87<br><br>Patients aged 45-73<br><br>Patients aged 36-93<br><br>Patients aged 34 | No phage sensitivity testing reported. | No details for most cases. Phages against <i>P. aeruginosa</i> in one case.                                                                                                                                                                                                                                                                     | No details of phage therapy provided. Phage was used as part of a varied package of care including debridement, wound care, 'biofilm management' and hyperbaric oxygen in some cases.                                                                                                                                                                                                                                                                            | Improvement reported in all patients. Outcome data inconsistently recorded. 2/4 venous ulcers healed in 8 and 12 weeks. 2/7 diabetic foot infections healed in 3.5 and 10 weeks. 1/4 decubitus ulcers healed in 4 weeks. 1/1 CA-MRSA healed in 35 days.                                                                                                    | Data unclear. |   |    | No comment.                                                   |
| Rhoads <i>et al.</i> (2009), [51]                                      | 18/20<br><br>Presumed <i>S. aureus</i> , <i>P.</i>                                                                                                            | Venous ulcer                                                                                                                                | Two patients in the treatment group (n = 20) dropped out for                                      | No phage sensitivity testing reported. | Phage cocktail WPP-201.                                                                                                                                                                                                                                                                                                                         | 4ml of WPP-201 in 46ml of saline. Instilled once weekly for 12 weeks by ultrasonic debridement machine at a drip rate of 200ml/h.                                                                                                                                                                                                                                                                                                                                | Outcome was assessed at 12 weeks based on degree of closure with follow up at 16 and 24 weeks.                                                                                                                                                                                                                                                             | 0             | 0 | 18 | 'No adverse effects were attributed to the study product'. No |

# Supplementary file four: phage therapy for the treatment of chronic wound or ulcer infections

|                                                          |                                                        |                          |                                                                                                                                                                                                                                        |                                        |                                                                                                                                                                                      |                                                                                                                                                                                                                                                                     |                                                                                                                                                                                                                          |   |   |   |                                                                                                            |
|----------------------------------------------------------|--------------------------------------------------------|--------------------------|----------------------------------------------------------------------------------------------------------------------------------------------------------------------------------------------------------------------------------------|----------------------------------------|--------------------------------------------------------------------------------------------------------------------------------------------------------------------------------------|---------------------------------------------------------------------------------------------------------------------------------------------------------------------------------------------------------------------------------------------------------------------|--------------------------------------------------------------------------------------------------------------------------------------------------------------------------------------------------------------------------|---|---|---|------------------------------------------------------------------------------------------------------------|
| US<br>Clinical trial                                     | <i>aeruginosa</i> and <i>E. coli</i> .                 |                          | unknown reasons, although no adverse effects were observed or reported. Patient mean age was 62.8.                                                                                                                                     |                                        | Contains eight types of phage active against <i>S. aureus</i> , <i>P. aeruginosa</i> and <i>E. coli</i> , each at 10 <sup>9</sup> PFU/ml and suspended in phosphate-buffered saline. | Dressings (Promogran, Acticoat, Allevyn and three-layer compression bandages) were applied with Bovine lactoferrin (1%) and xylitol (5%) topical gel.<br><br>Antibiotic administration was permitted where signs of acute inflammation were observed.               | No significant difference in wound healing was observed between the control (n = 21) and treatment (n = 18) groups.<br><br>The study number was directed by the FDA and the trial was not designed as an efficacy study. |   |   |   | significant differences in the quantity or quality of adverse effects was observed between the two groups. |
| Fish <i>et al.</i> (2016), [10]<br><br>US<br>Case series | 9/9<br><br>Infected with MRSA (n = 1) or MSSA (n = 8). | Diabetic infection (toe) | Detailed case report information provided for 6/9 patients aged 44-74. In 5/6 reports the patients had failed one or more courses of antibiotics, 1/6 patients were treated prophylactically. All patients had vascular insufficiency. | No phage sensitivity testing reported. | Monovalent suspension of anti-Staphylococcal phage Sb-1 at ~10 <sup>7</sup> -10 <sup>8</sup> PFU/ml.                                                                                 | Once weekly applications of 0.1-0.5cc. Phage was dripped into the wound cavity, which was packed with phage-soaked gauze, covered with petroleum gauze and dry gauze. The phage dressing was left in place for 48h. Phage therapy supplemented standard wound care. | All infections responded and healed in an average of 7 weeks. The patient treated prophylactically healed without infection.                                                                                             | 9 | 0 | 0 | 'No observed adverse effects during treatment' and 'no tissue breakdown or recurrence'.                    |

# Supplementary file four: phage therapy for the treatment of chronic wound or ulcer infections

|                                                                                |                                                                                                                                        |                                 |                                                                                                                          |                                        |                                                                                                                                                                                 |                                                                                                                                                                                                                                                                                                    |                                                                                                                                                                                                                                               |    |   |   |                                                                                                                |
|--------------------------------------------------------------------------------|----------------------------------------------------------------------------------------------------------------------------------------|---------------------------------|--------------------------------------------------------------------------------------------------------------------------|----------------------------------------|---------------------------------------------------------------------------------------------------------------------------------------------------------------------------------|----------------------------------------------------------------------------------------------------------------------------------------------------------------------------------------------------------------------------------------------------------------------------------------------------|-----------------------------------------------------------------------------------------------------------------------------------------------------------------------------------------------------------------------------------------------|----|---|---|----------------------------------------------------------------------------------------------------------------|
| Vlassov <i>et al.</i> (2016), [36], cited in [34]<br><br>Russia<br>Case series | 23/23<br><br>Pathogens: <i>E. coli</i> , <i>Klebsiella</i> spp., <i>P. aeruginosa</i> , <i>Proteus</i> spp. and <i>Staphylococci</i> . | Diabetic infection (foot)       | -                                                                                                                        | No phage sensitivity testing reported. | Phages against: <i>Staphylococci</i> , <i>Pseudomonas</i> , <i>E. coli</i> and <i>Enterococcus</i> at 10 <sup>8</sup> -10 <sup>10</sup> PFU/ml in combination with antibiotics. | Wound washing and topical application 1-4x daily for 5-14 days.                                                                                                                                                                                                                                    | Elimination of <i>S. aureus</i> or <i>E. coli</i> . or <i>P. aeruginosa</i> titre fell 3-4 orders in 13/13 patients with monomicrobial infections. Elimination or decrease in bacterial titre in 4/10 patients with polymicrobial infections. | 17 | 0 | 6 | No comment.                                                                                                    |
| Morozova <i>et al.</i> (2018), [55]<br><br>Russia<br>Case series               | 2/2<br><br>Pathogen: MRSA.                                                                                                             | Diabetic infection (foot, hand) | -                                                                                                                        | No phage sensitivity testing reported. | Different therapies in each case: 'Piobacteriophage' (Microgen) or 'lytic <i>Staphylococcus</i> bacteriophage' preparation. Antibiotics not reported.                           | 21 days of therapy in one case, further details not reported.                                                                                                                                                                                                                                      | Both infections healed, one in 28 days, the other time to resolution is unclear.                                                                                                                                                              | 2  | 0 | 0 | No comment.                                                                                                    |
| Fish <i>et al.</i> (2018), [53]<br><br>US<br>Case series                       | 2/6<br><br>(4 cases already presented in Fish <i>et al.</i> 2016).<br><br>All cases were <i>S. aureus</i> positive                     | Chronic non-healing wound       | 27-year-old female with osteomyelitis on the left great toe refractory to 8 weeks of IV and 2 weeks of oral antibiotics. | No phage sensitivity testing reported. | Monovalent suspension of Staphylococcal phage Sb-1, titre not reported.                                                                                                         | Once weekly applications of 0.1-0.5cc. Phage was dripped into the wound cavity, which was packed with phage-soaked gauze, covered with Xeroform® gauze and dry gauze. The phage dressing was left in place for 48h. This patient received 3 applications in 2 weeks before no longer being able to | Reduced inflammation was apparent 14 days after starting phage; the patient did not return to clinic. In June the patient sent a photo showing the wound had healed. Healing was maintained at                                                | 1  | 0 | 0 | 'No adverse effects, tissue breakdown or recurrence of infection were seen, and the progression to closure was |

# Supplementary file four: phage therapy for the treatment of chronic wound or ulcer infections

|                                                              |                                            |                         |                                                                                                                                                                                                                                                                                    |                                        |                                                                         |                                                                                                                                                                                                                                                        |                                                                                                                     |   |   |   |                                                                   |
|--------------------------------------------------------------|--------------------------------------------|-------------------------|------------------------------------------------------------------------------------------------------------------------------------------------------------------------------------------------------------------------------------------------------------------------------------|----------------------------------------|-------------------------------------------------------------------------|--------------------------------------------------------------------------------------------------------------------------------------------------------------------------------------------------------------------------------------------------------|---------------------------------------------------------------------------------------------------------------------|---|---|---|-------------------------------------------------------------------|
|                                                              | with 'perhaps a second or third organism'. |                         |                                                                                                                                                                                                                                                                                    |                                        |                                                                         | receive treatment because of caring for a relative.                                                                                                                                                                                                    | an unrelated appointment 2.5 years later.                                                                           |   |   |   | smooth and continuous after initiation of bacteriophage therapy.' |
|                                                              |                                            | Diabetic infection      | 71-year-old female with a toe ulcer. The patient had a <i>Clostridium difficile</i> infection secondary to lengthy use of antibiotics and was on vancomycin at the time of presentation for phage therapy. Bone culture revealed <i>S. epidermidis</i> and <i>S. lugdenensis</i> . |                                        |                                                                         | Following debridement, 0.5cc of phage was injected into the distal toe on three occasions: days 1, 7 and 28.                                                                                                                                           | The ulcer resolved in 8 weeks and there was no recurrence at an unrelated appointment approximately 4 months later. | 1 | 0 | 0 |                                                                   |
| Fish <i>et al.</i> (2018), [13]<br><br>US<br><br>Case report | 1/1<br><br>Positive for MSSA.              | Diabetic foot infection | 63-year-old female with a diabetic foot infection complicated by osteomyelitis.                                                                                                                                                                                                    | No phage sensitivity testing reported. | Monovalent suspension of Staphylococcal phage Sb-1, titre not reported. | Injections of 0.7cc of phage around the wound site once weekly for 7 weeks. Levofloxacin was administered after the first 7 days of treatment and was stopped after 7 days because of no notable clinical response. No further antibiotics were given. | Complete cure in 7 weeks. Osteomyelitis remained resolved three years later.                                        | 1 | 0 | 0 | No comment.                                                       |

# Supplementary file four: phage therapy for the treatment of chronic wound or ulcer infections

|                                                                  |                                                                                                                                                                                                                                                                                                                                                           |                           |                                                                                                                                                |                        |                                                                                                                                                                                                                         |                                                                                                                                                                                 |                                                                                                                                                                                                                                                                                                                |    |    |   |             |
|------------------------------------------------------------------|-----------------------------------------------------------------------------------------------------------------------------------------------------------------------------------------------------------------------------------------------------------------------------------------------------------------------------------------------------------|---------------------------|------------------------------------------------------------------------------------------------------------------------------------------------|------------------------|-------------------------------------------------------------------------------------------------------------------------------------------------------------------------------------------------------------------------|---------------------------------------------------------------------------------------------------------------------------------------------------------------------------------|----------------------------------------------------------------------------------------------------------------------------------------------------------------------------------------------------------------------------------------------------------------------------------------------------------------|----|----|---|-------------|
| Gupta <i>et al.</i> (2019), [56]<br><br>India<br><br>Case series | 20/20<br>Infected with <i>S. aureus</i> (n = 5), <i>E. coli</i> (n = 6) or <i>P. aeruginosa</i> (n = 9).                                                                                                                                                                                                                                                  | Chronic non-healing wound | Non-healing wounds of >6 weeks refractory to conventional wound care and systemic antibiotics. Patients were aged 12-60.                       | Sensitivity confirmed. | A cocktail of three phage isolated from local environmental water sources, each at 10 <sup>9</sup> PFU/ml.                                                                                                              | The cocktail was applied topically at 0.1ml/cm <sup>2</sup> on alternate days until the wound was bacteriologically sterile.                                                    | Bacteriological sterility was achieved after 3 phage applications by day 9 in 9/20 cases and by day 13 in the remaining 11 cases, which received a total of 5 phage applications.<br><br>After three months of therapy 7/20 had complete wound healing. The remaining 13 had significant clinical improvement. | 7  | 13 | 0 | No comment. |
| Patel <i>et al.</i> (2019), [38]<br><br>India<br><br>Case series | 46/48*<br><br>*Two patients lost to follow up.<br><br>Polymicrobial infection was present in 13 of 48 cases. Main pathogens were <i>E. coli</i> (37.5%), <i>P. aeruginosa</i> (31.2%), <i>S. aureus</i> (31.2%). Less prevalent pathogens included <i>Klebsiella</i> , <i>Proteus</i> , <i>Morganella</i> , <i>Citrobacter</i> and <i>Acinetobacter</i> . | Chronic non-healing wound | Non-healing wounds of >6 weeks refractory to conventional wound care and systemic antibiotics. Patient mean age was 47.3. 27/48 were diabetic. | Sensitivity confirmed. | Phage were isolated from local environmental water sources. Customised monovalent or polyvalent preparations were used based on phage sensitivity data. Phages were suspended in 0.9% saline at 10 <sup>9</sup> PFU/ml. | Phage preparations were applied using soaked gauze on alternate days at 0.5ml/cm <sup>3</sup> , for a total of 5-7 applications, until the wound was bacteriologically sterile. | By day 90 wounds had healed in 90.5% of non-diabetic and 74.1% of diabetic patients.                                                                                                                                                                                                                           | 39 | 5  | 2 | No comment. |
