# Supplementary material for: The Safety and Efficacy of Phage Therapy for Superficial Bacterial Infections: A Systematic Review
Source: MDPI journal article supplement (doi:10.3390/antibiotics9110754), 2020-10-29
Supplement: s1 [file s1]

Archive with 5 entries (5 files):
- Supplementary file S1.pdf
- Supplementary file S2.pdf
- Supplementary file S3.pdf
- Supplementary file S4.pdf
- Supplementary file S5.pdf
