# Supplementary material for: The Safety and Efficacy of Phage Therapy for Superficial Bacterial Infections: A Systematic Review
Source: MDPI journal article supplement (doi:10.3390/antibiotics9110754), 2020-10-29
Supplement: s1 [file s1]

# Supplementary file five: phage therapy for the treatment of dermatological infections

| Report details                                                |                                                        | Clinical details    |                                                                         |                                                          |                              |                                                                                             | Efficacy                                                                                                                                                                                                 |       |          | Safety & adverse effects |                                                                                                                                                                                                                                                                                                                                                                                                                                                                        |
|---------------------------------------------------------------|--------------------------------------------------------|---------------------|-------------------------------------------------------------------------|----------------------------------------------------------|------------------------------|---------------------------------------------------------------------------------------------|----------------------------------------------------------------------------------------------------------------------------------------------------------------------------------------------------------|-------|----------|--------------------------|------------------------------------------------------------------------------------------------------------------------------------------------------------------------------------------------------------------------------------------------------------------------------------------------------------------------------------------------------------------------------------------------------------------------------------------------------------------------|
| Author (year), [citation], location, study type               | No. of relevant reports and microbiology               | Condition details   |                                                                         | Phage sensitivity                                        | Phage treatment              | Treatment schedule and route(s)                                                             | Outcome                                                                                                                                                                                                  | Cured | Improved | No response              |                                                                                                                                                                                                                                                                                                                                                                                                                                                                        |
| Larkum (1929), [40]<br><br>US<br><br>Case series              | 231/264<br><br>All presumed Staphylococcal infection.  | Furuncles (n = 208) | Of <1 month [n = 84],<br>1 month – 1 year [n = 92],<br>>1 year [n = 32] | No phage sensitivity testing reported.                   | Staphylococcus phage lysate. | Subcutaneous (SC) inoculation of 1-2cc once daily. Treatment duration not reported.         | 77.9% of patients cured without recurrence after >6 months (n = 88), 1.5 to 6 months (n = 61) and <6 weeks (n = 13). Recurrences occurred in 40 patients, and no improvement was reported in 6 patients. | 202   | 0        | 6                        | Adverse reactions to SC inoculation of patients infected with Staphylococcus with Staphylococcus phage lysate were observed in the ‘majority of instances’ but ‘as a rule [were] extremely mild’. Observations were made for 149/208 patients, revealing: no adverse reactions (28.8%); mild local erythema and soreness (34.6%); general temperature and malaise (7.2%); severe (1%); no report (28.4%).<br><br>No comment about adverse effects among acne patients. |
|                                                               |                                                        | Acne (n = 23)       | -                                                                       |                                                          |                              | Local application. Dose and duration not reported.                                          | Cured, and remained so (8.7%); marked improvement (34.8%); no improvement (56.5%).                                                                                                                       | 2     | 8        | 13                       |                                                                                                                                                                                                                                                                                                                                                                                                                                                                        |
| Crutchfield & Stout (1930), [41]<br><br>US<br><br>Case series | 57/57<br><br>States a further 62 cases are unreported. | Carbuncles (n = 2)  | Of 2-3 days in patients aged 10 and 40                                  | Sensitive, n = 1<br>Not tested, n = 1                    | Staphylococcus phage.        | 3 and 11 SC injections, supplemented by irrigation.                                         | 2/2 recovered.                                                                                                                                                                                           | 2     | 0        | 0                        | ‘Severe local reaction’ reported for one case of furunculosis. No other comments on adverse effects.                                                                                                                                                                                                                                                                                                                                                                   |
|                                                               |                                                        | Furuncles (n = 13)  | Of 2 days to 18 months in patients aged 2 months to 64 years old        | Sensitive, n = 3<br>Resistant, n =1<br>Not tested, n = 9 |                              | 3-21 SC injections, supplemented by topical application (n = 3) or local injection (n = 4). | In 12/13 recovery, discharge or furuncle abortion was reported. In 10/12 cases a recovery                                                                                                                | 13    | 0        | 0                        |                                                                                                                                                                                                                                                                                                                                                                                                                                                                        |

# Supplementary file five: phage therapy for the treatment of dermatological infections

|  |                                        |                          |                                               |                                                                             |  |                                                                                             |                                                                                                                                                                                                                                                                                                                                                            |   |   |   |  |
|--|----------------------------------------|--------------------------|-----------------------------------------------|-----------------------------------------------------------------------------|--|---------------------------------------------------------------------------------------------|------------------------------------------------------------------------------------------------------------------------------------------------------------------------------------------------------------------------------------------------------------------------------------------------------------------------------------------------------------|---|---|---|--|
|  | All presumed Staphylococcal infection. |                          |                                               |                                                                             |  |                                                                                             | time was given, this ranged from 2-14 days, with a mean of 7.3 days. For 1/13 improvement was reported in the first week but recurrence occurred within 9 months.                                                                                                                                                                                          |   |   |   |  |
|  |                                        | Dermatitis (n = 7)       | Of 7 days to 12 months in patients aged 25-45 | Sensitive, n = 5<br>Not tested, n = 2                                       |  | 0-10 SC injections, supplemented by topical application (n = 5) or local injection (n = 1). | Recovery or resolution was reported for 4/7, with improvement seen after 1-2 days of therapy and recovery time of 5-14 days (n = 2). Despite recovery, 'resistance' was encountered for 1/4. One patient didn't improve after 3 injections. For 3/7 improvement was reported on day 3-14, but 'resistance' (n = 1) or 'antiphage' (n = 1) was encountered. | 4 | 2 | 1 |  |
|  |                                        | Sycosis vulgaris (n = 8) | Of 1 week to 2 years in patients aged 30-50   | Sensitive, n = 3<br>Not tested, n = 5                                       |  | 0-8 SC injections supplemented by topical application (n = 7).                              | Recovery, discharge or disappearance of pustules was reported for 8/8, with improvement seen on days 2-4 of treatment and recovery time of 4-14 days (n = 6).                                                                                                                                                                                              | 8 | 0 | 0 |  |
|  |                                        | Acne (n = 11)            | Of 6 months to 8 years in patients aged 15-45 | Sensitive, n = 4<br>Partial, n = 1<br>Resistant, n = 1<br>Not tested, n = 5 |  | 3-31 SC injections supplemented by local injection (n = 2).                                 | No results were reported for 1/11. Recovery was reported for 4/11, some improvement for 3/11 and no improvement for 2/11. Despite recovery, 'resistance' was reported in 2/4.                                                                                                                                                                              | 5 | 3 | 2 |  |

## Supplementary file five: phage therapy for the treatment of dermatological infections

[illegible]

# Supplementary file five: phage therapy for the treatment of dermatological infections

|                                                                                           |                                                                                                                                                |                                                                                    |                                       |                                                                                                                                                                                                                                                                             |                         |                                                                                                                                                                                                                                                                                                                                                                                                                                                                                                                                                                                                                                                                                         |                                                                                                                                                                    |    |   |   |                                                                                                                                                                                                                                                                                                                                                                                                                                                                                                                                                                                     |
|-------------------------------------------------------------------------------------------|------------------------------------------------------------------------------------------------------------------------------------------------|------------------------------------------------------------------------------------|---------------------------------------|-----------------------------------------------------------------------------------------------------------------------------------------------------------------------------------------------------------------------------------------------------------------------------|-------------------------|-----------------------------------------------------------------------------------------------------------------------------------------------------------------------------------------------------------------------------------------------------------------------------------------------------------------------------------------------------------------------------------------------------------------------------------------------------------------------------------------------------------------------------------------------------------------------------------------------------------------------------------------------------------------------------------------|--------------------------------------------------------------------------------------------------------------------------------------------------------------------|----|---|---|-------------------------------------------------------------------------------------------------------------------------------------------------------------------------------------------------------------------------------------------------------------------------------------------------------------------------------------------------------------------------------------------------------------------------------------------------------------------------------------------------------------------------------------------------------------------------------------|
|                                                                                           |                                                                                                                                                | Paronychia<br>(n = 1)                                                              | Of 1 week in a<br>patient aged 50     | Sensitive, n = 1                                                                                                                                                                                                                                                            |                         | 10 SC injections.                                                                                                                                                                                                                                                                                                                                                                                                                                                                                                                                                                                                                                                                       | Slow improvement<br>observed from day 2,<br>discharged after 1 week.                                                                                               | 1  | 0 | 0 |                                                                                                                                                                                                                                                                                                                                                                                                                                                                                                                                                                                     |
| Beridze <i>et al.</i> (1938),<br>[43], cited in<br>[32]<br><br>Georgia<br><br>Case series | 143/143<br><br>Of 132 cultures<br>isolated 82.5%<br>were <i>S. aureus</i><br>and 9.8% were<br>mixed<br>Staphylococcal<br>and<br>Streptococcal. | Patients aged 1-60. Infections<br>were acute (1-7 days) or<br>chronic (1-3 years). |                                       | Phage<br>susceptibility<br>screening for all<br>patients implied<br>but outcomes not<br>given. It was<br>noted that<br>negative <i>in vitro</i><br>susceptibility did<br>not preclude <i>in vivo</i> efficacy<br>likewise<br>susceptibility did<br>not predict<br>efficacy. | No details<br>reported. | 0.5ml of phage was injected into a<br>cleaned wound and surrounding<br>healthy tissue. The wound was then<br>covered with phage and bandaged. If,<br>on the following day, there was no<br>evidence of irritation, swelling or<br>allergy, phage therapy was continued,<br>with the dose increasing daily to 1ml on<br>day 2, 2ml on day 3. In total 4-5<br>injections were given. Phage was then<br>stopped and zinc salve or a similar<br>agent was used for 3 days. Phage<br>therapy was restarted if the infection<br>persisted and patients remaining<br>refractory underwent phototherapy.<br><br>It is presumed that this or a similar<br>protocol was used for each indication. | Of 143 patients:<br>74.8% were successfully<br>treated, improvement was<br>observed in 7.7%, no<br>improvement in 12.6% and<br>the outcome of 4.9% was<br>unknown. | -  |   |   | Side effects seen during<br>the first 24-48h after<br>phage administration. The<br>most frequent were<br>‘fever, malaise, pain at the<br>injection site, sweating,<br>headache, shivering,<br>itching, sleeplessness, bad<br>taste in mouth and<br>weakness.’ These side<br>effects were ‘only<br>temporary and usually<br>followed by a rapid<br>improvement within 24-<br>48h’. The authors consider<br>that phage lysis of<br>bacteria and the<br>consequent release of<br>bacterial proteins may<br>trigger the bodies’<br>immune system in a<br>manner akin to<br>vaccination. |
|                                                                                           |                                                                                                                                                | Furuncles<br>(n = 73)                                                              | 40 acute<br>13 subacute<br>20 chronic |                                                                                                                                                                                                                                                                             |                         |                                                                                                                                                                                                                                                                                                                                                                                                                                                                                                                                                                                                                                                                                         | 40/40 acute cured.                                                                                                                                                 | 40 | 0 | 0 |                                                                                                                                                                                                                                                                                                                                                                                                                                                                                                                                                                                     |
|                                                                                           |                                                                                                                                                | Abscesses<br>(n = 10)                                                              |                                       |                                                                                                                                                                                                                                                                             |                         |                                                                                                                                                                                                                                                                                                                                                                                                                                                                                                                                                                                                                                                                                         | 12/13 subacute cured, 1/13<br>improved after 20 days.                                                                                                              | 12 | 1 | 0 |                                                                                                                                                                                                                                                                                                                                                                                                                                                                                                                                                                                     |
|                                                                                           |                                                                                                                                                | Hidradenitis<br>(n = 7)                                                            |                                       |                                                                                                                                                                                                                                                                             |                         |                                                                                                                                                                                                                                                                                                                                                                                                                                                                                                                                                                                                                                                                                         | 13/20 chronic cured, 4/20<br>showed some<br>improvement, 3/20<br>remained unaffected.                                                                              | 13 | 4 | 3 |                                                                                                                                                                                                                                                                                                                                                                                                                                                                                                                                                                                     |
|                                                                                           |                                                                                                                                                | Impetigo contagiosa<br>(n = 13)                                                    |                                       |                                                                                                                                                                                                                                                                             |                         |                                                                                                                                                                                                                                                                                                                                                                                                                                                                                                                                                                                                                                                                                         | 7/10 cured, 3/10 no<br>improvement.                                                                                                                                | 7  | 0 | 3 |                                                                                                                                                                                                                                                                                                                                                                                                                                                                                                                                                                                     |
|                                                                                           |                                                                                                                                                | Impetigo vulgaris<br>(n = 29)                                                      |                                       |                                                                                                                                                                                                                                                                             |                         |                                                                                                                                                                                                                                                                                                                                                                                                                                                                                                                                                                                                                                                                                         | 7/7 cured in 3-5 days.                                                                                                                                             | 7  | 0 | 0 |                                                                                                                                                                                                                                                                                                                                                                                                                                                                                                                                                                                     |
|                                                                                           |                                                                                                                                                |                                                                                    |                                       |                                                                                                                                                                                                                                                                             |                         |                                                                                                                                                                                                                                                                                                                                                                                                                                                                                                                                                                                                                                                                                         | 5/13 cured in 5-6 days.                                                                                                                                            | 5  | ? | ? |                                                                                                                                                                                                                                                                                                                                                                                                                                                                                                                                                                                     |
|                                                                                           |                                                                                                                                                |                                                                                    |                                       |                                                                                                                                                                                                                                                                             |                         |                                                                                                                                                                                                                                                                                                                                                                                                                                                                                                                                                                                                                                                                                         | 20/29 cured in an average<br>of 6-10 days, 5/29 no<br>improvement, 4/29<br>‘observation ceased and<br>final outcome unknown’.                                      | 20 | ? | 5 |                                                                                                                                                                                                                                                                                                                                                                                                                                                                                                                                                                                     |

# Supplementary file five: phage therapy for the treatment of dermatological infections

|                                                                                       |                                                                              |                                                                                                                                                                       |                                        |                                                         |                                                                                                                                                                                                                                                                        |                                                                                                               |               |   |   |                                                                                                                                                                                                                                                                     |
|---------------------------------------------------------------------------------------|------------------------------------------------------------------------------|-----------------------------------------------------------------------------------------------------------------------------------------------------------------------|----------------------------------------|---------------------------------------------------------|------------------------------------------------------------------------------------------------------------------------------------------------------------------------------------------------------------------------------------------------------------------------|---------------------------------------------------------------------------------------------------------------|---------------|---|---|---------------------------------------------------------------------------------------------------------------------------------------------------------------------------------------------------------------------------------------------------------------------|
|                                                                                       |                                                                              | 'Various skin diseases'<br>(n = 11)                                                                                                                                   |                                        |                                                         |                                                                                                                                                                                                                                                                        | 3/11 cured.                                                                                                   | 3             | ? | ? |                                                                                                                                                                                                                                                                     |
| Bernstein <i>et al.</i> (1940), [58], cited in [32]<br><br>Belarus<br><br>Case series | 141/141<br><br>No microbiological details.                                   | Furunculosis<br>(n = 119)                                                                                                                                             | No phage sensitivity testing reported. | No details reported.                                    | Phages were administered by SC injection 'no more than 3 times in increasing doses (1ml, 2ml, 3ml) at intervals of 3 days'. This was supplemented by direct spraying of phages onto the wound at each dressing change.                                                 | Outcomes not clearly reported.                                                                                | Data unclear. |   |   | 15/141 showed side effects after SC injection. 12/15 were local reactions (redness, swelling) and 3/15 were generalized reactions (fever, rigors).                                                                                                                  |
|                                                                                       |                                                                              | Hidradenitis<br>(n = 22)                                                                                                                                              |                                        |                                                         |                                                                                                                                                                                                                                                                        | 16/22 cured.                                                                                                  | 16            | ? | ? |                                                                                                                                                                                                                                                                     |
| Izashvili (1957), [57], cited in [32]<br><br>Georgia<br><br>Case report               | 1/1<br><br>No microbiological details.                                       | Carbunculosi,<br>75-year old female.                                                                                                                                  | No phage sensitivity testing reported. | No details reported.                                    | 0.5ml of phage and penicillin (every 3h) administered subcutaneously on day 1 after presentation. Day 2, the patient was apyrexial. Day 3, a further 1ml of phage was administered subcutaneously. Day 5, patient remained apyrexial. Penicillin was stopped on day 6. | The infection had resolved upon discharge on day 14.                                                          | 1             | 0 | 0 | No comment.                                                                                                                                                                                                                                                         |
| Vartepetov (1957), [44], cited in [32]<br><br>Georgia<br><br>Case Series              | 50/50 patients treated in 1937<br><br>All presumed Staphylococcal infection. | Furunculosis (n = 15);<br>ecthyma vulgaris (n = 2);<br>staphylococcal sycosis (n = 2);<br>folliculitis (n = 6);<br>staphylococcal and streptococcal impetigo (n = 25) | No phage sensitivity testing reported. | Staphylococcal bacteriophages and 'pio-bacteriophages'. | SC injections, 2ml every 24h, supplemented by topical application in some cases.                                                                                                                                                                                       | 56% of furunculosis patients were healed.<br><br>Phage therapy of the other conditions was 'less successful'. | Data unclear. |   |   | 'Often a local reaction (redness, inflammation) may be observed at the site of phage injection, but this is not an indication that phage treatment should be halted. Sometimes (in about 8% of cases) during phage therapy with Staphylo- or pio-bacteriophages, an |

# Supplementary file five: phage therapy for the treatment of dermatological infections

|                                       |                                        |                                                                                                                                                                                                 |                     |                                        |                                                                                                                                                |                                                                                                                                                                                                                                         |                                                                                                                                                                      |               |   |   |                                                                                               |
|---------------------------------------|----------------------------------------|-------------------------------------------------------------------------------------------------------------------------------------------------------------------------------------------------|---------------------|----------------------------------------|------------------------------------------------------------------------------------------------------------------------------------------------|-----------------------------------------------------------------------------------------------------------------------------------------------------------------------------------------------------------------------------------------|----------------------------------------------------------------------------------------------------------------------------------------------------------------------|---------------|---|---|-----------------------------------------------------------------------------------------------|
|                                       | 117/117 patients treated in 1938-41    | Furuncles (n = 47)                                                                                                                                                                              |                     |                                        | 25 treated with Staphylococcal phage and 22 treated with 'pio-bacteriophage'.                                                                  | SC injections at progressively increasing doses (0.5ml, 1ml, 1.5ml and 2ml) every 24h.                                                                                                                                                  | 60-66% of patients were healed; 13.4-32% of cases showed clinical improvement and 8% of cases showed no effect. Average healing was 4.4 days.                        | Data unclear. |   |   | allergic rash was observed, which rapidly disappeared.'                                       |
|                                       | All presumed Staphylococcal infection. | Hidradenitis (n = 20); carbunculosi s (n = 7); ecthyma (n = 3); sycosis (n = 4); strepto-staphylococcal epidermitis (n = 25); abscesses (n = 4); ulcers & ecthyma (n = 6); folliculitis (n = 1) |                     |                                        | Treated with either Staphylococcal phage or 'pio-bacteriophage'.                                                                               |                                                                                                                                                                                                                                         | Data sparse. Average healing for carbunculosi s 'about 6 days' and for hidradenitis 7.2 days.                                                                        | Data unclear. |   |   |                                                                                               |
| Baker (1963), [45]                    | 48/56                                  | Acne vulgaris (n = 34)                                                                                                                                                                          | Patients aged 11-37 | No phage sensitivity testing reported. | Staphylococcus phage lysate containing 2 x 10 <sup>9</sup> lysed S. aureus and >10 <sup>10</sup> 'Gratia' Staphylococcus bacteriophage per cc. | 0.1cc SC increased by 0.1cc weekly to 0.5-0.6cc. Followed by 0.5-0.6cc every 2-3 weeks for 18-24 months.<br><br>Every SC dose was given with 0.3cc of intranasal aerosol.<br><br>Oral adjunctive ananase (plant protease) given orally. | 33 had 'very satisfactory results after 6 months' with 'no new lesions and blanching and thinning of scars.'<br><br>One patient had no relief.                       | 33            | 0 | 1 | 'None of these patients showed any allergic or adverse reaction.'                             |
| US Case series                        | All presumed Staphylococcal infection. | Furuncles (n = 14)                                                                                                                                                                              | Patients aged 3-61  |                                        | Staphylococcus phage lysate (as above).                                                                                                        | 0.1cc SC and increased by 0.1cc every 3-4 days to 0.3-0.5cc which was then continued once weekly for eight weeks.                                                                                                                       | 'Marked decrease in number, size and tenderness of lesions after the second dose and all patients were symptom free by the third week of treatment and remained so'. | 14            | 0 | 0 | 'No systemic reactions' and 'local reactions were mild and did not interfere with treatment'. |
| Shvelidze (1970), [46], cited in [32] | 161/161                                | Previous antibiotic therapy with penicillin, biomycin and streptomycin was unsuccessful.                                                                                                        |                     | No phage sensitivity testing reported. | Anti-Staphylococcal phages.                                                                                                                    | Anti-Staphylococcal phages were administered using intradermal injections of increasing doses given on                                                                                                                                  | 152/161 were successfully treated, significant improvement was recorded                                                                                              | -             |   |   | No comment.                                                                                   |

# Supplementary file five: phage therapy for the treatment of dermatological infections

|                                                               |                                                                                                     |                               |                                                                                                                                                                                                                       |                                                                                                                                          |                                                                                                                                                                   |                                                                                                                                                                   |                                                                                                                                                                                                                                   |    |    |   |                                                                                                                                          |
|---------------------------------------------------------------|-----------------------------------------------------------------------------------------------------|-------------------------------|-----------------------------------------------------------------------------------------------------------------------------------------------------------------------------------------------------------------------|------------------------------------------------------------------------------------------------------------------------------------------|-------------------------------------------------------------------------------------------------------------------------------------------------------------------|-------------------------------------------------------------------------------------------------------------------------------------------------------------------|-----------------------------------------------------------------------------------------------------------------------------------------------------------------------------------------------------------------------------------|----|----|---|------------------------------------------------------------------------------------------------------------------------------------------|
| Georgia<br>Case series                                        | 139 strains of coagulase positive <i>Staphylococcus</i> , 82.7% of which were penicillin resistant. |                               |                                                                                                                                                                                                                       |                                                                                                                                          |                                                                                                                                                                   | every second day (0.1ml, 0.2ml, 0.3ml, 0.4ml and 0.5ml) and further continued with a dose of 0.5ml. In total 7-10 injections were given around the infected site. | in 7/161 and no improvement in 2/161. 8.5% relapsed within 3-6 months but completely cured by further phage therapy.                                                                                                              |    |    |   |                                                                                                                                          |
|                                                               |                                                                                                     | Furuncles (n = 62)            | Of 3-10 days                                                                                                                                                                                                          |                                                                                                                                          |                                                                                                                                                                   |                                                                                                                                                                   | 97.7% cured<br>3.3% improved<br>0% no effect<br>4.8% re-infected                                                                                                                                                                  | 60 | 2  | 0 |                                                                                                                                          |
|                                                               |                                                                                                     | Carbuncles (n = 54)           | Of 5-10 days                                                                                                                                                                                                          |                                                                                                                                          |                                                                                                                                                                   |                                                                                                                                                                   | 66.7% cured<br>20.0% improved<br>13.3% no effect<br>11.1% re-infected                                                                                                                                                             | 30 | 17 | 7 |                                                                                                                                          |
|                                                               |                                                                                                     | Hidradenitis (n = 45)         | Of 5-10 days                                                                                                                                                                                                          |                                                                                                                                          |                                                                                                                                                                   |                                                                                                                                                                   | 88.9% cured<br>6.7% improved<br>4.4% no effect<br>6.6% re-infected                                                                                                                                                                | 37 | 6  | 2 |                                                                                                                                          |
| Slopek <i>et al.</i> (1987) [33]<br><br>Poland<br>Case series | 146/550                                                                                             | Furuncles (n = 55)            | All antibiotic resistant. 50/55 Staphylococcal infection, 5/55 polymicrobial, all including Staphylococci.                                                                                                            | No phage sensitivity testing reported. However, according to (Slopek <i>et al.</i> 1983 [60]), sensitivity confirmed, results not shown. | No details. However, according to (Slopek <i>et al.</i> 1983 [60]), a library of 259 phages was available for use. Crude phage lysates were used therapeutically. | No details. However, according to (Slopek <i>et al.</i> 1983 [60]), suggests that oral and local phage therapy was used.                                          | 'Good therapeutic result was obtained in all the cases (100%)'. Two of these cases showed 'marked improvement' and were culture negative.                                                                                         | 53 | 2  | 0 | No comment in this report. However, this report collates previous results which included the comments shown in supplementary file three. |
|                                                               |                                                                                                     | 'Skin inflammations' (n = 91) | 83/91 antibiotic resistant. Infections included abscesses, phlegmone, acne. 74 monomicrobial infections: 65/74 <i>Staphylococcus</i> ; 5/74 <i>Pseudomonas</i> ; 3/74 <i>Klebsiella</i> ; 1/74 <i>Escherichia</i> .17 |                                                                                                                                          |                                                                                                                                                                   |                                                                                                                                                                   | The infection was 'eliminated' in 86/91. Four of these cases showed 'marked improvement' and were culture negative. In 5/91 there was 'improvement with tendency towards healing', these were classed as 'transient improvement'. | 82 | 4  | 5 |                                                                                                                                          |

# Supplementary file five: phage therapy for the treatment of dermatological infections

|                                                                      |                                                                                 |                                     |                                                                                                                                                                                                 |                                                    |                                                                                                                                                                                                                                                                                                                             |                                                                                                                                                                                                                                                                                                                                                                                                                                                                                                                                                                                                                                           |                                                                                                                                                                                                                                                                                                           |   |   |   |                                                                                                                                                                                       |
|----------------------------------------------------------------------|---------------------------------------------------------------------------------|-------------------------------------|-------------------------------------------------------------------------------------------------------------------------------------------------------------------------------------------------|----------------------------------------------------|-----------------------------------------------------------------------------------------------------------------------------------------------------------------------------------------------------------------------------------------------------------------------------------------------------------------------------|-------------------------------------------------------------------------------------------------------------------------------------------------------------------------------------------------------------------------------------------------------------------------------------------------------------------------------------------------------------------------------------------------------------------------------------------------------------------------------------------------------------------------------------------------------------------------------------------------------------------------------------------|-----------------------------------------------------------------------------------------------------------------------------------------------------------------------------------------------------------------------------------------------------------------------------------------------------------|---|---|---|---------------------------------------------------------------------------------------------------------------------------------------------------------------------------------------|
|                                                                      |                                                                                 |                                     | polymicrobial infections.                                                                                                                                                                       |                                                    |                                                                                                                                                                                                                                                                                                                             |                                                                                                                                                                                                                                                                                                                                                                                                                                                                                                                                                                                                                                           |                                                                                                                                                                                                                                                                                                           |   |   |   |                                                                                                                                                                                       |
| Zhvania <i>et al.</i> (2017), [54]<br><br>Georgia<br><br>Case report | 1/1<br><br>'Affected areas of skin showed strong growth for <i>S. aureus</i> '. | Chronic, widespread skin infection. | Netherton Syndrome patient, 16-years old<br><br>Chronic (from 2 months old) antibiotic resistant <i>S. aureus</i> infection. Patient allergic to most groups of antibiotics and ointment bases. | Phage used chosen on basis of sensitivity testing. | Three phage products were used:<br>(1) 'Pyo' phage cocktail (vs. <i>Staphylococci</i> , <i>E. coli</i> , <i>P. aeruginosa</i> and <i>Proteus</i> )<br>(2) 'Fersis' phage cocktail (vs. <i>Staphylococci</i> and <i>Streptococci</i> )<br>(3) Sb1 anti-Staphylococcal phage<br><br>All were used at ~10 <sup>7</sup> PFU/ml. | 20 days of topical application of 'Pyo' phage solution, cream-based application of Sb and once-daily oral (10ml) doses of each of 'Pyo' and Sb1. Oral administration was preceded by 100ml alkaline mineral water. 'Pyo' was also used to treat eye and nose infections.<br><br>Treatment was stopped for 2 weeks (no reason given) and subsequently continued for another 20 days. After 3 months the <i>S. aureus</i> had developed resistance to 'Pyo', which was substituted for 'Fersis', which was shown to be active.<br><br>Treatment continued for another three months in the pattern of 20 days therapy, 2 weeks intermission. | Visual improvement on day 7 of therapy.<br><br>Netherton Area Severity Assessment declined from 1.4 to 11.2 (after 3 months) and 7.8 after 6 months.<br><br>Significant regeneration of skin without remission at three-month follow-up.<br><br>Stable at six-month follow-up with continued improvement. | 1 | 0 | 0 | No allergic reactions to phage were observed.<br><br>No clinically significant abnormalities in complete blood cell counts, liver function tests, electrolytes or glucose monitoring. |
