# Supplementary material for: The Safety and Efficacy of Phage Therapy for Superficial Bacterial Infections: A Systematic Review
Source: MDPI journal article supplement (doi:10.3390/antibiotics9110754), 2020-10-29
Supplement: s1 [file s1 › Supplementary file S2.pdf]

## Supplementary file two: critical appraisal

Critical appraisal of manuscripts was performed using the Joanna Briggs Institute suite of critical appraisal tools available from <https://joannabriggs.org/critical-appraisal-tools> [accessed 14/09/2020]. The case series tool was adapted to include comments on adverse effects and, where appropriate, examples of what each question was interrogating.

### Case series

| Author (year), [citation]          | Clear inclusion criteria? | Reliable standard measurement of presenting condition? | Valid identification of infection (e.g. defined microbiology)? | Consecutive inclusion? | Complete inclusion and reporting? | Clear patient demographic data (e.g. range and mean of patient age)? | Clear clinical reporting (pre- treatment)? | Clear outcome or follow up reporting (e.g. clinical outcome)? | Comments on adverse effects? | Clear site demographic (e.g. study location)? | Appropriate statistical analysis, if present? | Comments                                                                                                                                                    |
|------------------------------------|---------------------------|--------------------------------------------------------|----------------------------------------------------------------|------------------------|-----------------------------------|----------------------------------------------------------------------|--------------------------------------------|---------------------------------------------------------------|------------------------------|-----------------------------------------------|-----------------------------------------------|-------------------------------------------------------------------------------------------------------------------------------------------------------------|
| Larkum (1929), [40]                | No                        | Unclear                                                | No                                                             | Unclear                | Yes*                              | No                                                                   | Yes                                        | Yes                                                           | Yes                          | Yes                                           | N/A                                           | *Numerical discrepancy of one between raw and summary data. Raw data used.                                                                                  |
| Crutchfield & Stout (1930), [41]   | No                        | Unclear                                                | No                                                             | Unclear                | No*                               | Yes                                                                  | Yes                                        | Yes                                                           | Yes                          | No                                            | N/A                                           | *States 119 patients treated, but only 57 reported.                                                                                                         |
| Beridze <i>et al.</i> (1938), [43] | No                        | Unclear                                                | Unclear                                                        | Unclear                | Yes                               | No                                                                   | Yes                                        | Unclear*                                                      | Yes                          | Yes                                           | N/A                                           | *Outcome data not fully reported for impetigo and 'various skin diseases'.<br><br>Numerical discrepancy of one between raw and summary data. Raw data used. |

|                                                   |     |         |          |         |         |     |           |         |      |         |     |                                                                                                                                                 |
|---------------------------------------------------|-----|---------|----------|---------|---------|-----|-----------|---------|------|---------|-----|-------------------------------------------------------------------------------------------------------------------------------------------------|
| Bernstein <i>et al.</i> (1940), [58]              | No  | Unclear | No       | Unclear | Yes*    | No  | No        | No      | Yes  | Yes     | N/A | *Yes for hidradenitis (22/141). Data for furunculosis (119/141) contained irreconcilable numerical discrepancies and was consequently excluded. |
| Vartepetov (1957), [44]                           | No  | Unclear | Unclear  | Unclear | Yes     | No  | No        | No      | Yes  | No      | N/A |                                                                                                                                                 |
| Baker (1963), [45]                                | No  | Unclear | No       | Unclear | Yes     | No  | Yes       | Yes     | Yes  | Yes     | N/A |                                                                                                                                                 |
| Shvelidze (1970), [46]                            | No  | Yes     | Yes      | Unclear | Yes     | No  | Yes       | Yes     | No   | No      | N/A |                                                                                                                                                 |
| Slopek <i>et al.</i> (1987), [33]                 | No  | Yes     | Yes      | Unclear | Yes     | No  | Yes       | Yes     | Yes* | Yes     | N/A | *See preliminary paper Slopek <i>et al.</i> 1983 [59]                                                                                           |
| Abul-Hassan <i>et al.</i> 1990, [35]              | Yes | Yes     | Yes      | Unclear | Yes     | No  | Yes       | Yes     | No   | No      | N/A |                                                                                                                                                 |
| Weber-Dabrowska, Mulczyk & Górski (2000), [47]    | No  | Yes     | Yes      | Unclear | Yes     | No  | No        | Yes     | No   | Yes     | N/A |                                                                                                                                                 |
| Lazareva <i>et al.</i> (2001), [37]               | No  | Unclear | Yes      | Unclear | Yes     | No  | No        | Unclear | No   | Unclear | N/A |                                                                                                                                                 |
| Markoishvili <i>et al.</i> (2002), [48]           | No  | Yes     | Unclear* | Yes     | Yes     | No  | Unclear** | Yes     | Yes  | Yes     | N/A | *Microbiological data presented for 22/96 patients.<br>**Clear data given for 22/96 patients.                                                   |
| Jikia <i>et al.</i> (2005), [49]                  | No  | Yes     | Yes      | Yes     | Yes     | Yes | Yes       | Yes     | No   | Yes     | N/A |                                                                                                                                                 |
| Southwest Regional Wound Care Centre (2006), [31] | No  | Yes     | No       | No      | Unclear | Yes | Yes       | Yes     | No   | Yes     | N/A |                                                                                                                                                 |

|                                     |     |         |         |         |     |     |         |         |     |     |     |                                                               |
|-------------------------------------|-----|---------|---------|---------|-----|-----|---------|---------|-----|-----|-----|---------------------------------------------------------------|
| Rose <i>et al.</i> (2014), [52]     | Yes | Yes     | Yes     | Unclear | Yes | No  | Yes     | Yes     | Yes | Yes | N/A |                                                               |
| Fish <i>et al.</i> (2016), [10]     | Yes | Yes     | Yes     | Unclear | No* | Yes | Yes     | Yes     | Yes | No  | N/A | *Nine patients treated; six 'representative' cases presented. |
| Vlassov <i>et al.</i> (2016), [36]  | No  | Unclear | Yes     | Unclear | Yes | No  | No      | Unclear | No  | No  | N/A |                                                               |
| Fish <i>et al.</i> (2018), [53]     | Yes | Yes     | Yes     | Unclear | Yes | Yes | Yes     | Yes     | Yes | No  | N/A |                                                               |
| Morozova <i>et al.</i> (2018), [55] | No  | Yes     | Unclear | No      | Yes | No  | Unclear | Yes     | No  | No  | N/A | .                                                             |
| Gupta <i>et al.</i> 2019, [56]      | Yes | Yes     | Yes     | Unclear | Yes | No  | Yes     | Yes     | No  | Yes | Yes |                                                               |
| Patel <i>et al.</i> 2019, [38]      | Yes | Yes     | Yes     | Unclear | Yes | Yes | Yes     | Yes     | No  | Yes | Yes |                                                               |

## Case reports

| Author<br>(year)                   | Were the patient's<br>demographics<br>clearly reported? | Was the patient's<br>history clearly<br>described? | Was the current<br>clinical condition<br>clearly described? | Were diagnostic<br>tests or methods<br>and results clearly<br>described? | Were the<br>treatment(s) or<br>intervention(s) clearly<br>described? | Was the post-<br>intervention clinical<br>condition clearly<br>described? | Were any adverse<br>or unanticipated<br>events clearly<br>described? |
|------------------------------------|---------------------------------------------------------|----------------------------------------------------|-------------------------------------------------------------|--------------------------------------------------------------------------|----------------------------------------------------------------------|---------------------------------------------------------------------------|----------------------------------------------------------------------|
| Izashvili (1957), [57]             | Yes                                                     | Yes                                                | Yes                                                         | Yes                                                                      | Unclear                                                              | Yes                                                                       | Unclear                                                              |
| Marza <i>et al.</i> (2006), [50]   | Yes                                                     | Yes                                                | Yes                                                         | Yes                                                                      | Yes                                                                  | Yes                                                                       | Yes                                                                  |
| Zhvania <i>et al.</i> (2017), [54] | Yes                                                     | Yes                                                | Yes                                                         | Yes                                                                      | Yes                                                                  | Yes                                                                       | Yes                                                                  |
| Fish <i>et al.</i> (2018), [13]    | Yes                                                     | Yes                                                | Yes                                                         | Yes                                                                      | Yes                                                                  | Yes                                                                       | Yes                                                                  |

## Clinical trials

| Author<br>(year)                     | True randomisation? | Allocation to treatment groups<br>concealed? | Treatment groups similar at<br>baseline? | Participants blind to assignment? | Treatment givers blind to<br>assignment? | Outcome assessors blind to<br>assignment? | Treatment groups treated<br>identically - other than the<br>intervention | Complete follow up? | Participants analysed in allocated<br>groups? | Consistent outcome<br>measurement? | Reliable outcome measurement? | Appropriate statistical analysis? | Was the trial design appropriate? |
|--------------------------------------|---------------------|----------------------------------------------|------------------------------------------|-----------------------------------|------------------------------------------|-------------------------------------------|--------------------------------------------------------------------------|---------------------|-----------------------------------------------|------------------------------------|-------------------------------|-----------------------------------|-----------------------------------|
| Rhoads <i>et al.</i><br>(2009), [51] | Yes                 | Yes                                          | Yes                                      | Yes                               | Unclear                                  | Unclear                                   | Yes                                                                      | Yes                 | Yes                                           | Yes                                | Yes                           | Yes                               | Yes                               |
| Jault <i>et al.</i><br>(2019), [12]  | Yes                 | Yes                                          | Yes                                      | Yes                               | No                                       | Yes                                       | Yes                                                                      | Yes                 | Yes                                           | Yes                                | Yes                           | Yes                               | Yes                               |
