# Supplementary material for: The Safety and Efficacy of Phage Therapy for Superficial Bacterial Infections: A Systematic Review
Source: MDPI journal article supplement (doi:10.3390/antibiotics9110754), 2020-10-29
Supplement: s1 [file s1 › Supplementary file S3.pdf]

### Supplementary file three: phage therapy for the treatment of burn wound infections

| Report details                                                                        |                                                                                                                               | Clinical details                                                                                                                  |                                                            |                                                                          |                                                                                                                                                                                                                                                                                                                                      | Efficacy                                                                                                                                                                                                                                                                                                               |               |          | Safety & adverse effects |             |
|---------------------------------------------------------------------------------------|-------------------------------------------------------------------------------------------------------------------------------|-----------------------------------------------------------------------------------------------------------------------------------|------------------------------------------------------------|--------------------------------------------------------------------------|--------------------------------------------------------------------------------------------------------------------------------------------------------------------------------------------------------------------------------------------------------------------------------------------------------------------------------------|------------------------------------------------------------------------------------------------------------------------------------------------------------------------------------------------------------------------------------------------------------------------------------------------------------------------|---------------|----------|--------------------------|-------------|
| Author (year), [citation], location, study type                                       | No. of relevant reports and microbiology                                                                                      | Condition details                                                                                                                 | Phage sensitivity                                          | Phage treatment                                                          | Treatment schedule and route(s)                                                                                                                                                                                                                                                                                                      | Outcome                                                                                                                                                                                                                                                                                                                | Cured         | Improved |                          | No response |
| Abul-Hassan <i>et al.</i> (1990), [35], cited in [34]<br><br>Egypt<br><br>Case series | 30/30<br><br><i>Pseudomonas</i> infection of burn wounds, resistant to all available antibiotics and chemotherapeutic agents. | 6/30 patients were children aged <9, the rest were aged 18-54. Burn wound infection area ranged from 10-21% of body surface area. | Sensitivity confirmed.                                     | <i>Pseudomonas</i> phage at 10 <sup>10</sup> PFU/ml. No further details. | Gauze soaked in phage was applied 3 times daily for 5-17 days as required. Use of concurrent antibiotic therapy unclear.                                                                                                                                                                                                             | After phage therapy, 12/30 had negative microbiology; 15/30 had improved, 9/30 had slight improvement and 6/30 had no improvement; discharge stopped in 12/30, diminished in 12/30 and didn't change in 6/30; the effect of phage therapy on skin graft taking was excellent in 6/30, good in 12/30 and poor in 12/30. | 0             | 24       | 6                        | No comment. |
| Weber-Dabrowska, Mulczyk & Górski (2000), [47]<br><br>Poland<br><br>Case series       | 49/1307<br><br>Infected with <i>S. aureus</i> , <i>E. coli</i> , <i>Klebsiella</i> , <i>Proteus</i> or <i>Pseudomonas</i> .   | Pyogenic burns. Most were chronic infections that had failed antibiotic therapy.                                                  | Combined sensitivity data presented for all 1307 patients. | Crude, sterile, bacteriophage lysate.                                    | Three times daily. Adults 10ml, children 5ml.<br><br>Orally and '30 minutes before eating, after neutralisation of the gastric juice'<br><br>Local administration also used on a case-by-case basis, details unclear.<br><br>Therapy duration for all 1307 patients reported as ranging from 1-12 weeks, with an average of 32 days. | 42/49 recovered fully.<br><br>7/49 had 'marked improvement' but bacteria were still detectable.                                                                                                                                                                                                                        | 42            | 7        | 0                        | No comment. |
| Lazareva <i>et al.</i> (2001), [37], cited in [34]                                    | 54/54<br><br>Organisms: <i>Enterococci</i> , <i>E. coli</i> , <i>P. aeruginosa</i>                                            | Burn wound infection.                                                                                                             | No phage sensitivity testing reported.                     | 'Pyophage' cocktail.                                                     | Oral therapy. '2 tablets 3 times a day in 1-1.5h before meals' for 7 days. 45 patients treated with antibiotics and phage. Nine treated with phage only.                                                                                                                                                                             | For patients treated with antibiotics and phage the number of microbial isolates in wounds dropped by 2.2x and positive blood culture                                                                                                                                                                                  | Data unclear. |          |                          | No comment. |

### Supplementary file three: phage therapy for the treatment of burn wound infections

|                                                                          |                                                  |                                                                                                                                                                                                                   |                        |                                                                                                                                                                                                                                                                                                                                                                                                                                         |                                                                                                                                                                                                                                                                        |                                                                                                                                                                                                                                                                                                                                   |   |   |   |                                                                                                                                                                                              |
|--------------------------------------------------------------------------|--------------------------------------------------|-------------------------------------------------------------------------------------------------------------------------------------------------------------------------------------------------------------------|------------------------|-----------------------------------------------------------------------------------------------------------------------------------------------------------------------------------------------------------------------------------------------------------------------------------------------------------------------------------------------------------------------------------------------------------------------------------------|------------------------------------------------------------------------------------------------------------------------------------------------------------------------------------------------------------------------------------------------------------------------|-----------------------------------------------------------------------------------------------------------------------------------------------------------------------------------------------------------------------------------------------------------------------------------------------------------------------------------|---|---|---|----------------------------------------------------------------------------------------------------------------------------------------------------------------------------------------------|
| Russia<br>Case series                                                    | and<br><i>Staphylococci</i> .                    |                                                                                                                                                                                                                   |                        |                                                                                                                                                                                                                                                                                                                                                                                                                                         |                                                                                                                                                                                                                                                                        | results dropped 55 to 37%.<br>Wound healing in 9/9 patients treated with phage only.                                                                                                                                                                                                                                              | 9 | 0 | 0 |                                                                                                                                                                                              |
| Jikia <i>et al.</i> (2005), [49]<br><br>Georgia<br>Case series           | 2/3<br><br><i>S. aureus</i> isolated from burns. | Two males aged 45 and 52 with radiation burns infected with <i>S. aureus</i><br><br>Previous treatment with intravenous antibiotics and antimicrobial ointments for 23 days was unable to resolve the infections. | Sensitivity confirmed. | 'Phagobioderm'. A biodegradable bandage containing a mix of chemotherapeutics and phages:<br><br>10 <sup>6</sup> PFU/ml 'Pyo' phage cocktail (vs. <i>S. aureus</i> , <i>P. aeruginosa</i> , <i>E. coli</i> , <i>Streptococcus</i> and <i>Proteus</i> )<br><br>Also: ciprofloxacin (0.6mg/cm <sup>2</sup> ); benzocaine (0.9mg/cm <sup>2</sup> ); α-chymotrypsin (0.05mg/cm <sup>2</sup> ); sodium bicarbonate (3.75mg/cm <sup>2</sup> ) | A single application of 'Phagobioderm' immobilised with sterile bandages<br><br>Wounds examined daily for 5 days and once every 2-4 days thereafter.<br>Microbiology monitored, frequency not reported.                                                                | Two days after application of Phagobioderm purulent discharge from both patients reduced to 'almost none'.<br><br>On day 7 both ulcers tested negative for <i>S. aureus</i> and both were able to receive skin grafts.<br><br>The <i>S. aureus</i> isolates from both patients were later shown to be resistant to ciprofloxacin. | 2 | 0 | 0 | No comment.                                                                                                                                                                                  |
| Marza, Soothill, Boydell & Collyns (2006), [50]<br><br>UK<br>Case report | 1/2<br><br><i>P. aeruginosa</i> infection.       | 50% surface area burns with skin grafts applied. Refractory to appropriate antibiotic treatment.                                                                                                                  | Sensitivity confirmed. | <i>Pseudomonas</i> phage at 10 <sup>15</sup> PFU/ml.                                                                                                                                                                                                                                                                                                                                                                                    | 10 <sup>3</sup> PFU of phage in 0.2ml was absorbed into two 25mm sterile filter paper discs which were placed on the infected areas.<br><br>After 48h the discs contained 4.3 x 10 <sup>4</sup> and 1.2 x 10 <sup>6</sup> PFU respectively, showing phage replication. | <i>Pseudomonas</i> was not isolated from the wound 3 days after treatment and subsequent extensive skin grafting was successful.                                                                                                                                                                                                  | 1 | 0 | 0 | 'No toxicity to human keratinocytes was observed when they were cultured with the purified phage suspension.'<br><br>'Several hours [after application to the whole wound] the patient had a |

### Supplementary file three: phage therapy for the treatment of burn wound infections

|                                                                               |                                                                                         |                                                                                                                                                                                            |                                        |                                                                                                                                                          |                                                                                                                                                                                                                                                                                                                                                                                                                                                                                                                                                                                                                                                                                                                                                                                                                                           |                                                                                                                                                                                                                                                                                                                                                                                                                            |   |   |   |                                                                                                                                                 |
|-------------------------------------------------------------------------------|-----------------------------------------------------------------------------------------|--------------------------------------------------------------------------------------------------------------------------------------------------------------------------------------------|----------------------------------------|----------------------------------------------------------------------------------------------------------------------------------------------------------|-------------------------------------------------------------------------------------------------------------------------------------------------------------------------------------------------------------------------------------------------------------------------------------------------------------------------------------------------------------------------------------------------------------------------------------------------------------------------------------------------------------------------------------------------------------------------------------------------------------------------------------------------------------------------------------------------------------------------------------------------------------------------------------------------------------------------------------------|----------------------------------------------------------------------------------------------------------------------------------------------------------------------------------------------------------------------------------------------------------------------------------------------------------------------------------------------------------------------------------------------------------------------------|---|---|---|-------------------------------------------------------------------------------------------------------------------------------------------------|
|                                                                               |                                                                                         |                                                                                                                                                                                            |                                        |                                                                                                                                                          | Phage was then applied to the whole wound area.<br><br>Phage was used alongside IV ceftazidime.                                                                                                                                                                                                                                                                                                                                                                                                                                                                                                                                                                                                                                                                                                                                           |                                                                                                                                                                                                                                                                                                                                                                                                                            |   |   |   | febrile episode, but similar episodes had occurred previously and otherwise no adverse effects were observed.'                                  |
| Southwest Regional Wound Care Centre, 2006, [31]<br><br>US<br><br>Case series | 1/28<br><br>MRSA positive infected burn wound.                                          | MRSA positive burn wound of approx. 2 months duration in a 60-year-old male on methotrexate and high-dose prednisone for autoimmunity.                                                     | No phage sensitivity testing reported. | No details.                                                                                                                                              | Wound debrided and phages applied weekly as part of wound care.                                                                                                                                                                                                                                                                                                                                                                                                                                                                                                                                                                                                                                                                                                                                                                           | Complete healing in 11 weeks.                                                                                                                                                                                                                                                                                                                                                                                              | 1 | 0 | 0 | No comment.                                                                                                                                     |
| Rose <i>et al.</i> (2014), [52]<br><br>Belgium<br><br>Case series             | 9/9<br><br>Multi-drug resistant <i>P. aeruginosa</i> and/or <i>S. aureus</i> infection. | Burn-wound infection. One patient had two burn wound infections.<br><br>Mean patient age was 61 years old (range, 27-88 years old). Mean total burned surface area was 30% (range, 6-45%). | Sensitivity confirmed.                 | 'BFC-1' cocktail, containing lytic phages active against <i>P. aeruginosa</i> (14/1 and PNM) and <i>S. aureus</i> (ISP), each at 10 <sup>9</sup> PFU/ml. | BFC-1 was applied in a single topical dose at an average of 0.03ml per cm <sup>2</sup> .<br><br>The cocktail was applied to half of a patient's wound area, the other half of the wound received standard care. Punch biopsies of each half of the wounds were taken before and 2-4h after BFC-1 therapy. Five phage applications took place during surgery, prior to which wounds had been cleansed with 5% Hibitane and filtered water. Average area of phage administration was 95cm <sup>2</sup> (range, 25-150cm <sup>2</sup> ).<br><br>Patients with <i>P. aeruginosa</i> were also treated with one dose (25mg/kg initially) of amikacin in combination with ceftazidime (1g initially) or meropenem (2g/8h). Patients with <i>S. aureus</i> infection were also treated with vancomycin (1g initially) or linezolid (1200mg/day). | The bacterial loads were found to be very low in 8/10 wounds, owing to delays in admission to the trial during which patients received intensive antibiotic therapy.<br><br>In all cases, the biopsy bacterial load was unchanged after phage application.<br><br>The authors note that they did 'not [expect] that a one-off application [...] on a small wound surface would generate conclusive proof of the efficacy'. | 0 | 0 | 9 | 'No adverse effects, clinical abnormalities or changes in laboratory results that could be related to the application of phages were observed.' |

### Supplementary file three: phage therapy for the treatment of burn wound infections

|                                                                                |                                                                                             |                                                                                                                                                                                                    |                                                                                                                 |                                                                                                                                |                                                                                                                                                                        |                                                                                                                                                                                                                                                               |   |   |    |                                                                                                                                                                                                                                                                                                                                                                                                                                                                                                                                                    |
|--------------------------------------------------------------------------------|---------------------------------------------------------------------------------------------|----------------------------------------------------------------------------------------------------------------------------------------------------------------------------------------------------|-----------------------------------------------------------------------------------------------------------------|--------------------------------------------------------------------------------------------------------------------------------|------------------------------------------------------------------------------------------------------------------------------------------------------------------------|---------------------------------------------------------------------------------------------------------------------------------------------------------------------------------------------------------------------------------------------------------------|---|---|----|----------------------------------------------------------------------------------------------------------------------------------------------------------------------------------------------------------------------------------------------------------------------------------------------------------------------------------------------------------------------------------------------------------------------------------------------------------------------------------------------------------------------------------------------------|
| Jault <i>et al.</i> (2019), [12]<br><br>France & Belgium<br><br>Clinical trial | 10/12<br><br>Two did not receive a full course.<br><br><i>P. aeruginosa</i> infected burns. | Average patient age was 61, with an average of 19% of body surface area burned, with an average of 6% third degree burns. Two patients were receiving antibiotic therapy at the time on enrolment. | Sensitivity confirmed.<br><br>Amongst those who did not reach the primary endpoint 3/10 had resistant colonies. | PP1131 cocktail (12 lytic phages)<br><br>Planned $10^6$ PFU/ml, but deteriorated to $10^2$ PFU/ml (considered subtherapeutic). | Once daily topical application for 7 days. Adjunctive antibiotic therapy at the discretion of the treating physician according to French Burn society recommendations. | Primary outcome was time taken for a sustained reduction in bacterial burden of two quadrants or more assessed by semi-quantitative culture results:<br><br>Phage group: median 144h (95% CI, 48h to not reached)<br><br>Control group: 47h (95% CI, 23-122h) | 0 | 0 | 10 | <p>'Safety assessments included frequency, duration and severity of adverse events, clinical laboratory tests, vital sign measurements, physical examinations and clinical assessment of burn wounds.'</p> <p>'Adverse events' reported among 23% of phage patients and 54% of control patients. No substantial difference between the groups.</p> <p>Although the phage titre was <math>10^2</math> PFU/ml, the equivalent of <math>10^6</math> phage particles (most inactive) were applied to patients and 'did not provoke safety issues'.</p> |
|--------------------------------------------------------------------------------|---------------------------------------------------------------------------------------------|----------------------------------------------------------------------------------------------------------------------------------------------------------------------------------------------------|-----------------------------------------------------------------------------------------------------------------|--------------------------------------------------------------------------------------------------------------------------------|------------------------------------------------------------------------------------------------------------------------------------------------------------------------|---------------------------------------------------------------------------------------------------------------------------------------------------------------------------------------------------------------------------------------------------------------|---|---|----|----------------------------------------------------------------------------------------------------------------------------------------------------------------------------------------------------------------------------------------------------------------------------------------------------------------------------------------------------------------------------------------------------------------------------------------------------------------------------------------------------------------------------------------------------|
